# Supplementary material for: DNA methylation analysis of paediatric low-grade astrocytomas identifies a tumour-specific hypomethylation signature in pilocytic astrocytomas
Source: PubMed Central journal article supplement (PMC4882864; doi:10.1186/s40478-016-0323-6), 2016-05-27
Supplement: 40478_2016_323_MOESM4_ESM.pdf [file 40478_2016_323_MOESM4_ESM.pdf]

**Table S3**

**Overview of comparisons performed between pilocytic astrocytomas and diffuse astrocytomas, study controls, and normal brain tissue**

Differentially methylated CpG sites ( $\delta\beta \geq 0.3$ , FDR-corrected p-value  $< 0.05$ ) were identified by MethLAB analysis.

|          | Comparison                           | Differentially methylated CpG sites* |                      | Total  |
|----------|--------------------------------------|--------------------------------------|----------------------|--------|
| <b>A</b> | PA <sup>1</sup> v Ctrls <sup>2</sup> | PA>Ctrls: 375                        | PA<Ctrls: 583        | 958    |
|          | DA <sup>3</sup> v Ctrls              | DA>Ctrls: 252                        | DA<Ctrls: 100        | 352    |
|          | PA v DA                              | PA>DA: 11                            | PA<DA: 304           | 315    |
| <b>B</b> | PAi v CB <sup>4</sup>                | PAi>CB: 7,309                        | PAi<CB: 4,362        | 11,671 |
|          | PAi <sup>5</sup> v FCB <sup>6</sup>  | PAi>FCB: 14,488                      | PAi<FCB: 6,991       | 21,479 |
|          | PAi v ACB <sup>7</sup>               | PAi>ACB: 22,187                      | PAi<ACB: 13,012      | 35,199 |
|          | FCB v ACB                            | FCB>ACB: 10,281                      | FCB<ACB: 8,226       | 18,507 |
| <b>C</b> | PAs <sup>8</sup> v CC <sup>9</sup>   | PAs>CC: 37                           | PAs<CC: 345          | 382    |
|          | PAs v FCC <sup>10</sup>              | PAs>FCC: 14,156                      | PAs<FCC: 3,130       | 17,300 |
|          | PAs v ACC <sup>11</sup>              | PAs>ACC: 1,164                       | PAs<ACC: 1,154       | 2,318  |
| <b>D</b> | DA v CC                              | DA>CC: 33                            | DA<CC: 25            | 58     |
|          | DA v FCC                             | DA>FCC: 15,891                       | DA<FCC: 1,834        | 17,725 |
|          | DA v ACC                             | DA>ACC: 1,329                        | DA<ACC: 203          | 1,532  |
| <b>E</b> | PAs v Glial <sup>12</sup>            | PAs>Glial: 1,128                     | PAs<Glial: 1,514     | 2,642  |
|          | PAs v Neuronal <sup>13</sup>         | PAs>Neuronal: 9,060                  | PAs<Neuronal: 13,281 | 22,341 |
|          | DA v Glial                           | DA>Glial: 1,228                      | DA<Glial: 270        | 1,498  |
|          | DA v Neuronal                        | DA>Neuronal: 11,514                  | DA<Neuronal: 10,772  | 22,286 |
| <b>F</b> | PAi v PAs                            | PAi>PAs: 7                           | PAi<PAs: 65          | 72     |
|          | PAi v DA                             | PAi>DA: 17                           | PAi<DA: 376          | 393    |

\* For each comparison, the no. of CpG sites which are relatively hypo- or hypermethylated is shown.

<sup>1</sup> PA - Pilocytic astrocytomas, n=17

<sup>2</sup> Ctrls - Study controls, n=5; adult brain; foetal brain, foetal frontal lobe; foetal cerebellum; neural stem cells (REN VM cell-line)

<sup>3</sup> DA - Diffuse astrocytomas, n=10

<sup>4</sup> CB - All cerebellum controls, n=7

<sup>5</sup> PAi - Infratentorial Pilocytic astrocytomas, n=11

<sup>6</sup> FCB - Foetal cerebellum, n=5, study FCB x1; FCB x4 GSE44684

[Lambert et al, 2013, Acta Neuropath 126: 291-301]

<sup>7</sup> ACB - Adult cerebellum, n=2, GSE44684 [Lambert et al, 2013, Acta Neuropath 126: 291-301]

<sup>8</sup> PAs - Supratentorial Pilocytic astrocytomas, n=6

<sup>9</sup> CC - All cerebral cortex controls, n=12

<sup>10</sup> FCC - Foetal cortex controls, n=2, study foetal brain and frontal lobe

<sup>11</sup> ACC - Adult cerebral cortex, n=2, GSE41826 [Guintivano et al, 2013, Epigenetics 8: 290-302]

<sup>12</sup> Glial component of cerebral cortex, n=4, GSE41826 [Guintivano et al, 2013, Epigenetics 8: 290-302]

<sup>13</sup> Neuronal component of cerebral cortex, n=4, GSE41826 [Guintivano et al, 2013, Epigenetics 8: 290-302]
