# Supplementary material for: DNA methylation analysis of paediatric low-grade astrocytomas identifies a tumour-specific hypomethylation signature in pilocytic astrocytomas
Source: PubMed Central journal article supplement (PMC4882864; doi:10.1186/s40478-016-0323-6), 2016-05-27
Supplement: 40478_2016_323_MOESM14_ESM.pdf [file 40478_2016_323_MOESM14_ESM.pdf]

**Table S13. Functions of genes which show a significant correlation between DNA methylation and gene expression.**

The majority of genes were hypomethylated in pilocytic astrocytomas except the genes highlighted in bold, which were hypermethylated in the pilocytic astrocytomas.

| Gene Symbol           | Gene Name                                                         | Gene Function                                                                                                                                                                                                                       |
|-----------------------|-------------------------------------------------------------------|-------------------------------------------------------------------------------------------------------------------------------------------------------------------------------------------------------------------------------------|
| <i>ABCC3</i>          | ATP-Binding Cassette, Sub-Family C (CFTR/MRP), Member 3           | ATP-binding cassette (ABC) transporters carry molecules across extra- and intracellular membranes. Involved in multi-drug resistance in cancer.                                                                                     |
| <i>AIM1</i>           | Absent in melanoma 1                                              | Beta/gamma-crystallin domain containing protein. Proposed tumour suppressor role in melanoma. Interacts with the cytoskeleton.                                                                                                      |
| <i>CD59</i>           | CD59 complement molecule                                          | Regulates complement-mediated cell lysis. Mutations cause CD59 deficiency, leading to hemolytic anaemia and thrombosis, and in turn to cerebral infarction.                                                                         |
| <i>FAM167A</i>        | Family with sequence similarity 167, member A                     | Not known                                                                                                                                                                                                                           |
| <i>FOS</i>            | FBJ murine osteosarcoma viral oncogene homolog                    | Downstream target of MAPK pathway. Dimerises with JUN proteins forming transcription factor AP-1 which regulates cell proliferation, differentiation and transformation.                                                            |
| <i>HRH1</i>           | Histamine receptor H1                                             | Mediates release of catecholamine from adrenal medulla and neurotransmission. Mediates increase in capillary permeability due to contraction of terminal venules.                                                                   |
| <i>IGSF9B</i>         | Immunoglobulin superfamily, member 9B                             | Functions in dendrite outgrowth and synapse maturation.                                                                                                                                                                             |
| <i>IL6ST</i>          | Interleukin 6 signal transducer (gp130, oncostatin M receptor)    | Signal transducer used by many cytokines. Functions as part of cytokine receptor complex.                                                                                                                                           |
| <i>KCND2</i>          | Potassium voltage-gated channel, Shal-related subfamily, member 2 | Voltage gated potassium channel, so many functions incl: neurotransmitter release, neuronal excitability, smooth muscle contraction and cell volume.                                                                                |
| <b><i>KIRREL3</i></b> | <b>Kin of IRRE like 3 (Drosophila)</b>                            | <b>Ensures size- and charge-selective ultrafiltration in brain (foetal and adult) and kidney. Mutation is associated with mental retardation.</b>                                                                                   |
| <i>LDLRAD3</i>        | Low density lipoprotein receptor class A domain containing 3      | Low density lipoprotein receptor. May influence amyloid precursor protein processing.                                                                                                                                               |
| <i>LEPREL1</i>        | Leprecan-like 1                                                   | Critical in collagen chain assembly and stability by catalysing hydroxylation of proline residues. Mutations are associated with myopia and cataract and vitreoretinal degeneration. Downregulation may play role in breast cancer. |
| <i>MIR21</i>          | MicroRNA 21                                                       | Oncomir that targets several tumour suppressors.                                                                                                                                                                                    |
| <i>OPCML</i>          | Opioid binding protein/cell adhesion molecule-like                | Located in the plasma membrane and may be opioid receptor. Highly conserved in mammalian species.                                                                                                                                   |
| <i>PRSS23</i>         | Protease, serine, 23                                              | Serine protease. Highly conserved in vertebrates, may have important ovarian function.                                                                                                                                              |
| <i>RARRES1</i>        | Retinoic acid receptor responder (tazarotene induced) 1           | Retinoid acid receptor responsive gene. Upregulated by tazarotene and retinoic receptors. Downregulation in prostate cancer caused by CpG island methylation.                                                                       |
| <i>SOCS3</i>          | Suppressor of cytokine signaling 3                                | Negative regulator of cytokine signalling. Induced by cytokines including IL6, IL10 and IFN and can bind to JAK2. Mouse studies suggest roles in negative regulation of foetal liver hematopoiesis and placental development.       |
| <i>TM4SF1</i>         | Transmembrane 4 L six family member 1                             | Cell surface antigen. Mediates signal transduction events in developmental regulation, activation, growth and motility. Highly expressed in different carcinomas.                                                                   |
| <i>TMEM132C</i>       | Transmembrane protein 132C                                        | Transmembrane protein.                                                                                                                                                                                                              |
| <i>TMEM49</i>         | VMP1 - vacuole membrane protein                                   | Stress induced protein. When overexpressed, promotes                                                                                                                                                                                |

|                 |                                                                    |                                                                                                                                                                                                                                                                                                                                  |
|-----------------|--------------------------------------------------------------------|----------------------------------------------------------------------------------------------------------------------------------------------------------------------------------------------------------------------------------------------------------------------------------------------------------------------------------|
|                 | 1                                                                  | formation of intracellular vacuoles followed by cell death. Important role in formation of cell junctions, involved in cell-cell adhesion.                                                                                                                                                                                       |
| <i>TRPM8</i>    | Transient receptor potential cation channel, subfamily M, member 8 | Receptor activated cation channel associated with sensing coolness (of temperature) or menthol.                                                                                                                                                                                                                                  |
| <i>WSCD1</i>    | WSC domain containing 1                                            | Not known                                                                                                                                                                                                                                                                                                                        |
| <i>CDK6</i>     | Cyclin-dependent kinase 6                                          | Regulates G1-S phase progression by forming complex with CDK6, phosphorylating RB and allowing E2F to transcribe S phase genes.                                                                                                                                                                                                  |
| <i>CHRM3</i>    | Cholinergic receptor, muscarinic 3                                 | Mediates various cellular responses including inhibition of adenylate cyclase, breakdown of phosphoinositides and modulation of potassium channels through action of G proteins.                                                                                                                                                 |
| <i>COTL1</i>    | Coactosin-like F-actin binding protein 1                           | Binds to F actin in a calcium independent manner, interacts with 5-lipoxygenase (first committed enzyme in leukotriene biosynthesis).                                                                                                                                                                                            |
| <i>DUSP5</i>    | Dual specificity phosphatase 5                                     | Phosphatase that negatively regulates ERK1.                                                                                                                                                                                                                                                                                      |
| <i>FAM89A</i>   | Family with sequence similarity 89, member A                       | Not known                                                                                                                                                                                                                                                                                                                        |
| <i>GJA1</i>     | Gap junction protein, alpha 1, 43kDa                               | Component of gap junctions. Major component of gap junctions in heart; important for synchronising heart contractions and in embryonic development. Mutations related to heart malformations and oculodentodigital dysplasia.                                                                                                    |
| <i>GRIA4</i>    | Glutamate receptor, ionotropic, AMPA 4                             | Glutamate receptor that functions as ligand gated ion channel. Important in synaptic transmission.                                                                                                                                                                                                                               |
| <i>IGF1R</i>    | Insulin-like growth factor 1 receptor                              | Receptor that binds insulin-like growth factor with tyrosine kinase activity. Insulin like growth factor plays important role in transformation by indirectly activating RAS-MAPK pathway and PI3K-AKT/PKB pathway.                                                                                                              |
| <i>IRX1</i>     | <b>Iroquois homeobox 1</b>                                         | <b>Involved in pattern formation in embryo. Tumour suppressor in gastric and head and neck cancers.</b>                                                                                                                                                                                                                          |
| <i>MCC</i>      | <b>Mutated in colorectal cancers</b>                               | <b>Candidate colorectal tumour suppressor thought to negatively regulate cell cycle progression. Suppresses cell proliferation and WNT/<math>\beta</math>-Catenin pathway in colorectal cancer.</b>                                                                                                                              |
| <i>MDGA2</i>    | MAM domain containing glycosylphosphatidylinositol anchor 2        | May be involved in cell-cell interactions.                                                                                                                                                                                                                                                                                       |
| <i>PRSS23</i>   | Protease, serine, 23                                               | Encodes a trypsin. Decrease of mRNA found after induced ovulations in mice. May be an important ovarian protease. Highly conserved in vertebrates.                                                                                                                                                                               |
| <i>PTPRE</i>    | Protein tyrosine phosphatase, receptor type, E                     | PTPs are signalling molecules that regulate variety of cellular processes including growth and differentiation, mitotic cycle and oncogenic transformation. Studies of the mouse gene suggest regulator roles in RAS related pathways, cytokine induced SATA signalling and activation of voltage gated K <sup>+</sup> channels. |
| <i>STAMBPL1</i> | STAM binding protein-like 1                                        | Zinc metalloprotease that cleaves lys-63'-linked polyubiquitin chains.                                                                                                                                                                                                                                                           |
| <i>TMEM169</i>  | Transmembrane protein 169                                          | Not known                                                                                                                                                                                                                                                                                                                        |
