# Supplementary material for: DNA methylation analysis of paediatric low-grade astrocytomas identifies a tumour-specific hypomethylation signature in pilocytic astrocytomas
Source: Acta Neuropathol Commun. 2016 May 27;4:54. doi: 10.1186/s40478-016-0323-6 (PMC4882864; doi:10.1186/s40478-016-0323-6)
Supplement: Additional file 18: Table S17. — Ingenuity Pathway Analysis (IPA) of genes associated with differentially methylated sites in infratentorial pilocytic astrocytomas and normal cerebellum. IPA analysis of the top 20 significant biological and disease categories including their functional annotation (p-value <0.05) identified for 161 genes that had ≤2 fold change in gene expression and δβ ≥ 0.3, sorted by p-value. (XLSX 71 kb) [file 40478_2016_323_MOESM18_ESM.xlsx]

## Sheet:  Info
Acta Neuropathologica DNA methylation analysis of paediatric low-grade astrocytomas identifies a tumour-specific hypomethylation signature in pilocytic astrocytomas Jennie N. Jeyapalan, Gabriel T. Doctor, Tania A. Jones, Samuel N. Alberman, Alexander Tep, Chirag M. Haria, Ed C. Schwalbe, Isabel C. F. Morley, Alfred A. Hill, Magdalena LeCain, Diego Ottaviani, Steven C. Clifford, Ibrahim Qaddoumi, …
Table S17. Ingenuity Pathway Analysis (IPA) of genes associated with differentially methylated sites in infratentorial pilocytic astrocytomas and normal cerebellum IPA analysis of the top 20 significant biological and disease categories including their functional annotation (p-value <0.05) identified for 161 genes that had ≤2 fold change in gene expression and δβ ≥ 0.3, sorted by p-value.

## Sheet: IPA iPAvCB
Supplementary Table 17
Ingenuity pathway analysis (IPA) for the genes associated with the differentially methylated sites identified between infratentorial pilocytic astrocytomas and normal cerebellum
IPA analysis of the top 20 significant biological and disease categories which includes their functions annotation (p-value <0.05) that were identified for 146 genes that had ≤2 fold change in gene expression and δβ ≥ 0.3, sorted by p-value.
Categories	Diseases or Functions Annotation	p-Value	# Molecules
Cellular Movement	cell movement	9.41e-09	50
Cancer	abdominal cancer	1.46e-08	106
Amino Acid Metabolism, Post-Translational Modification	phosphorylation of L-amino acid	4.13e-08	13
Cellular Growthand Proliferation	proliferation of cells	4.43e-08	71
Cancer	Cancer	1.1e-07	139
Cell Morphology, Cellular Assembly and Organization	formation of cellular protrusions	4.22e-07	25
Cell Morphology	sprouting	4.66e-07	16
Cellular Movement	migration of cells	5.35e-07	43
Cellular Development	differentiation of cells	8.39e-07	46
Cell Morphology, Cellular Assembly and Organization	branching of neurons	9.8e-07	13
Cancer	epithelial neoplasia	1.08e-06	105
Cell Morphology, Cellular Assembly and Organization	growth of neurites	1.21e-06	18
Molecular Transport	secretion of molecule	1.48e-06	19
Cell Morphology, Cellular Assembly and Organization	neuritogenesis	1.51e-06	18
Cellular Development, Cellular Growth and Proliferation	proliferation of neuronal cells	1.88e-08	20
Amino Acid Metabolism, Post-Translational Modification	phosphorylation of L-tryosine	1.93e-06	10
Cancer, Hematological Disease	bone marrow neoplasm	3.13e-06	23
Cell Morphology, Cellular Assembly and Organization	branching of neurites	3.47e-06	12
Cellular Development, Nervous system Development	development of neurons	3.52e-06	21
Cell Morphology, Cellular Assembly and Organization	outgrowth of neurites	3.93e-06	16
